# Supplementary material for: Using different natural origin carriers for development of epigallocatechin gallate (EGCG) solid formulations with improved antioxidant activity by PGSS-drying
Source: Royal Society of Chemistry journal article supplement (doi:10.1039/c6ra13499h), 2016-01-01
Supplement: c6ra13499h1.pdf [file c6ra13499h1.pdf]

Supplementary data

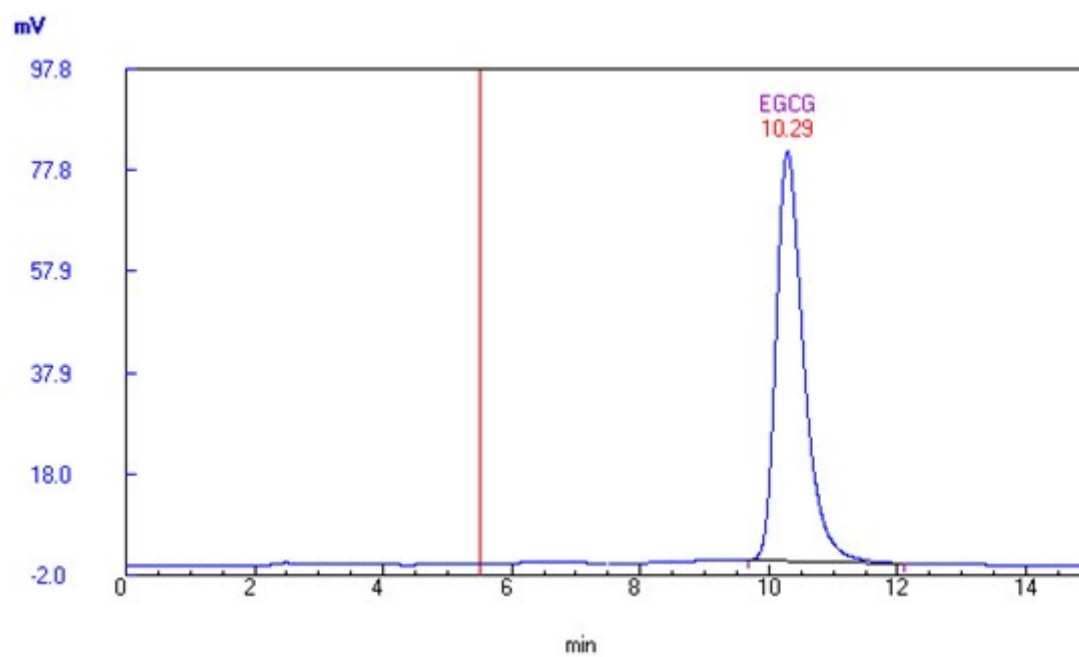

**Figure 1.** Typical HPLC chromatogram for the quantification of EGCG

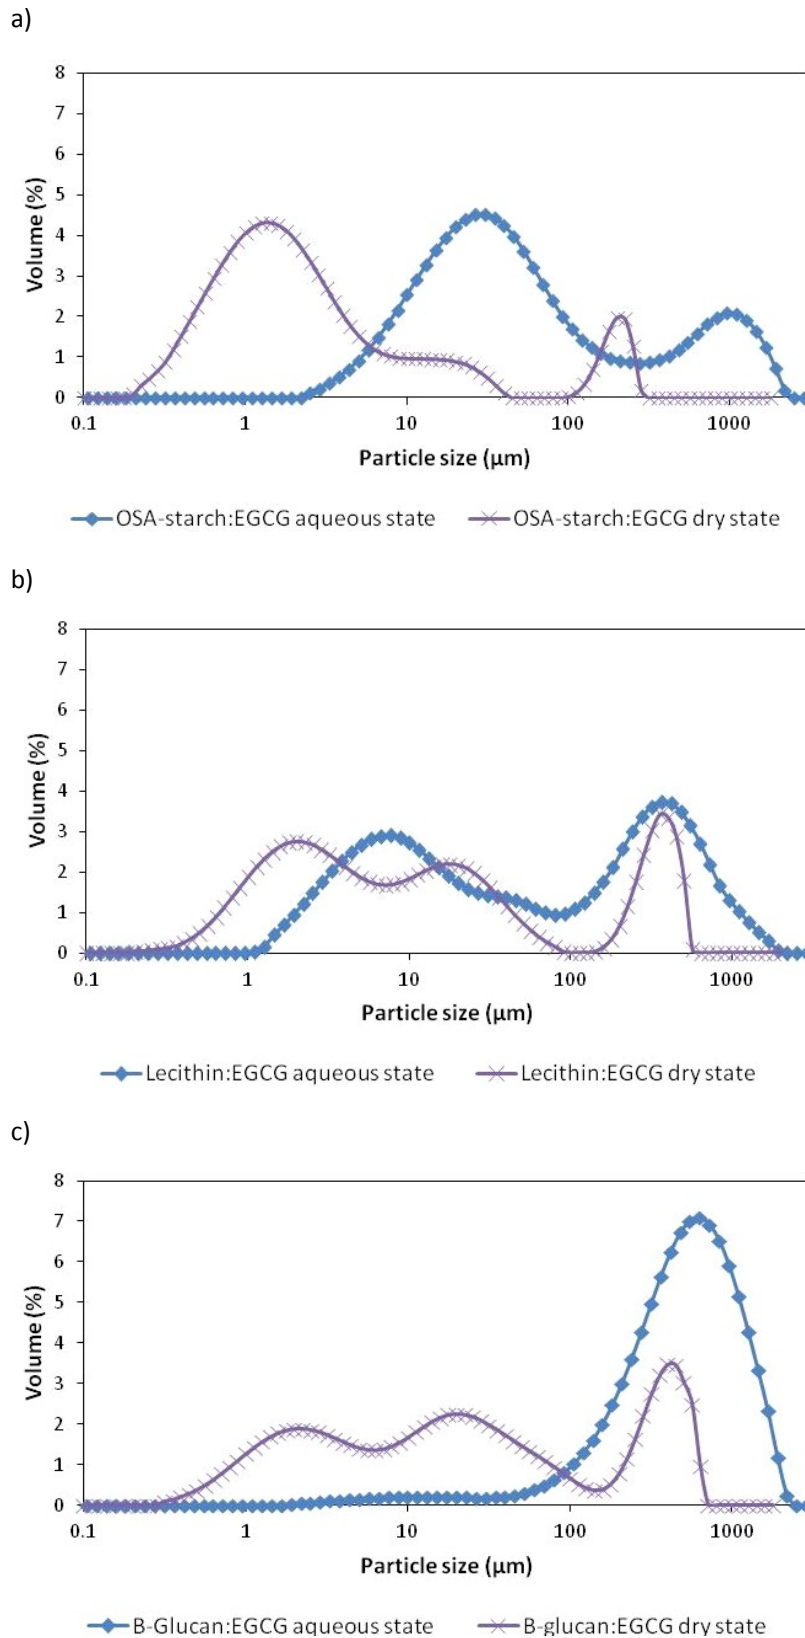

**Figure 2.** Particle size distribution of EGCG-loaded particles produced by PGSS-drying with different carrier materials (aqueous and dry state); a) OSA-starch, b) Lecithin and c)  $\beta$ -glucan
